# Supplementary material
Source: publisher site journal article supplement (https://www.dovepress.com/article/350846)
Supplement: Supplementary file 1 [file get_supplementary_file.php]

**Supplementary data**


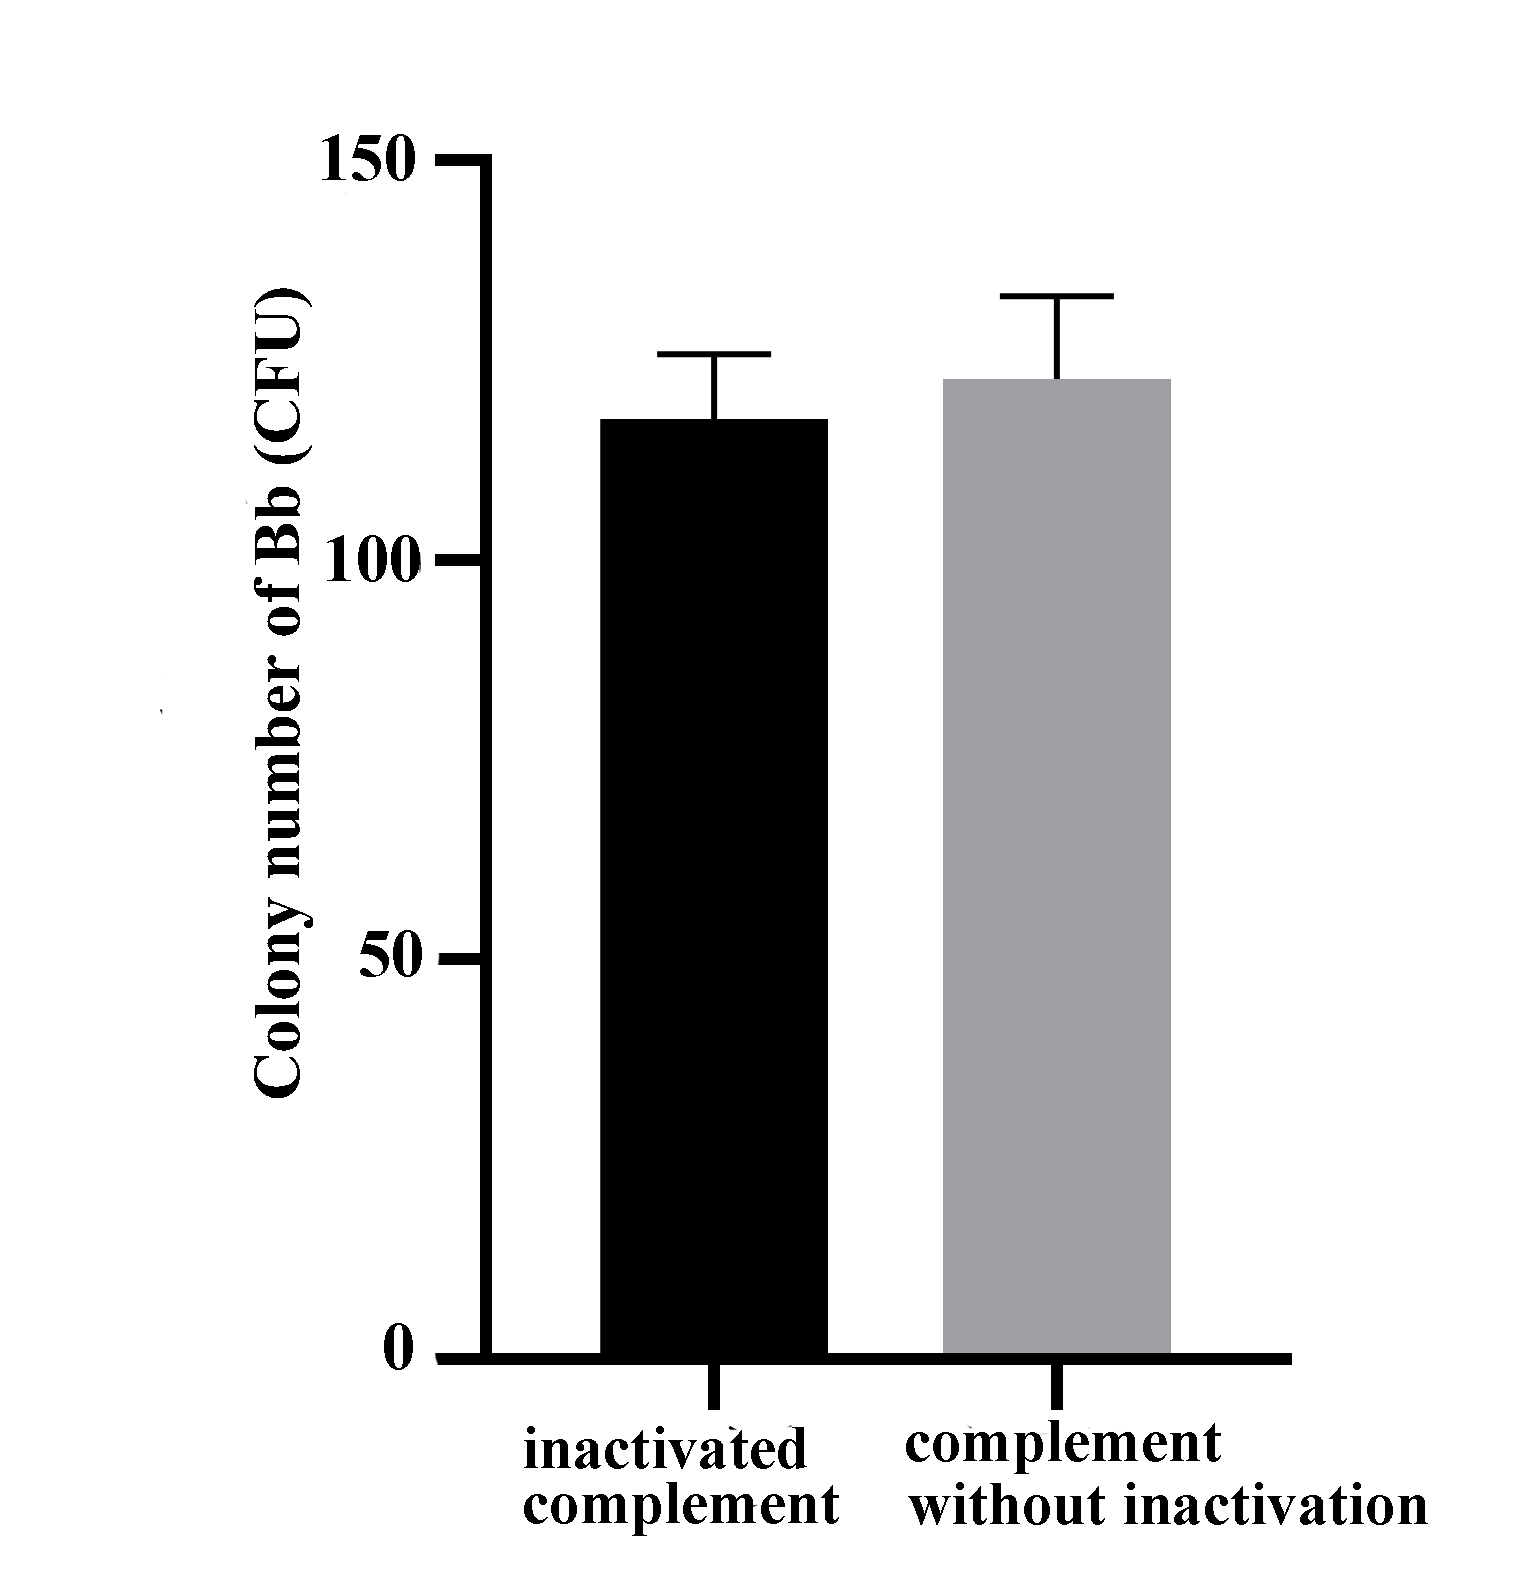


Fig S1 Natural bactericidal rate of guinea pig complement.

There was no significant difference in the colony number of Bb with or without guinea pig complement inactivation.


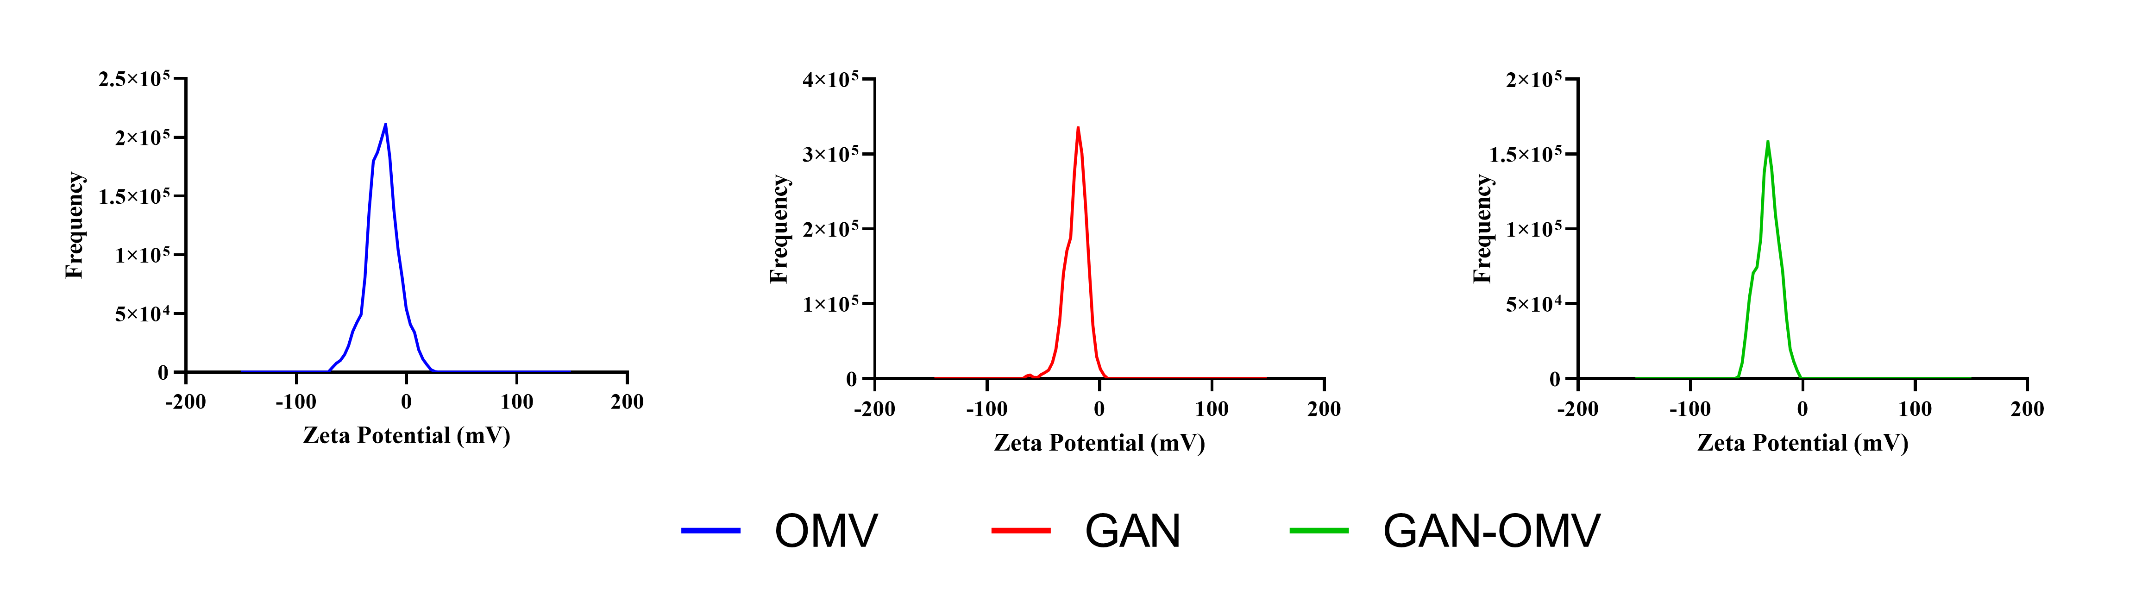


Figure S2 Zeta potential of OMV, GAN and GAN-OMV


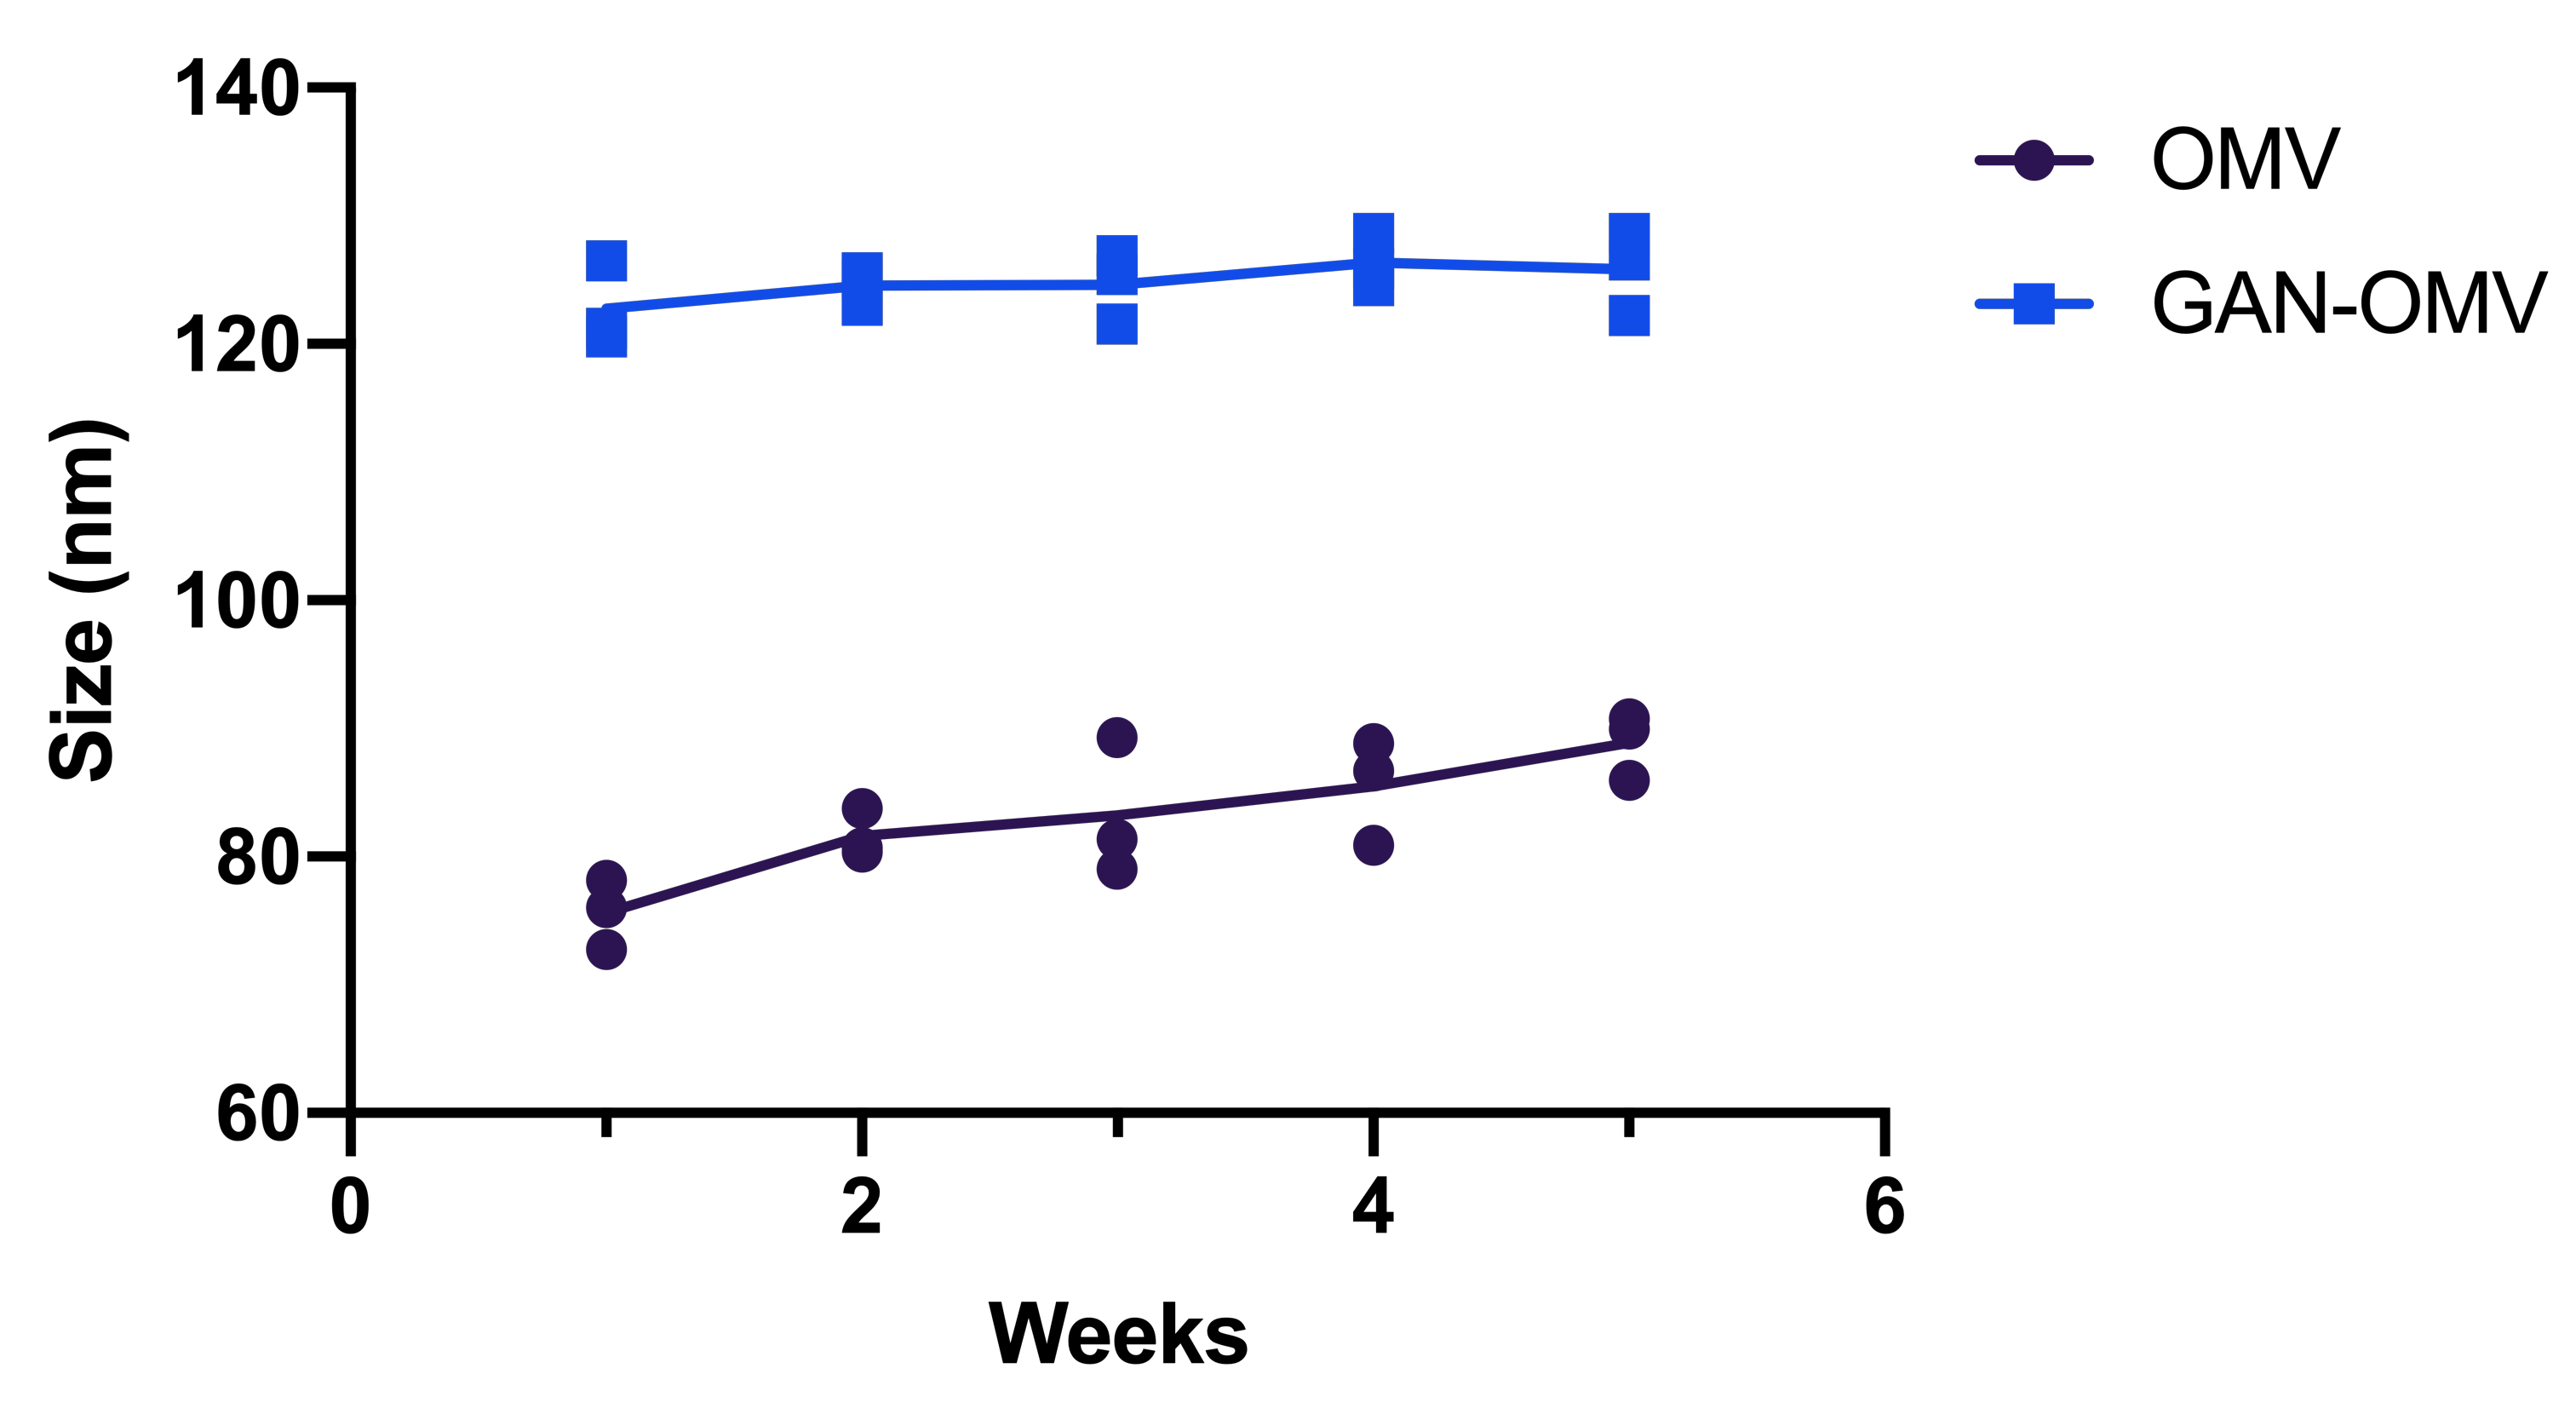


Fig. S3 Comparison of the stability of GAN-OMV and OMV
